# Supplementary material for: Oxidative stress and histological changes in Corbicula fluminea exposed to nano-Al13 and monomeric Al coagulants
Source: Royal Society of Chemistry journal article supplement (doi:10.1039/c9en00320g), 2019-01-01
Supplement: c9en00320g1.pdf [file c9en00320g1.pdf]

## Supplementary

**Fig. 1:**

1d:

|        |                    | Paired Differences |                |                 |                                           |           | t        | df | Sig. (2-tailed) |
|--------|--------------------|--------------------|----------------|-----------------|-------------------------------------------|-----------|----------|----|-----------------|
|        |                    | Mean               | Std. Deviation | Std. Error Mean | 95% Confidence Interval of the Difference |           |          |    |                 |
|        |                    |                    |                |                 | Lower                                     | Upper     |          |    |                 |
| Pair 1 | Control - Al13low  | 7.38333            | .76376         | .44096          | 5.48604                                   | 9.28062   | 16.744   | 2  | .004            |
| Pair 2 | Control - Almlow   | 7.38333            | .65064         | .37565          | 5.76705                                   | 8.99961   | 19.655   | 2  | .003            |
| Pair 3 | Control - Al13high | 6.92834            | 1.00000        | .57735          | 4.44420                                   | 9.41249   | 12.000   | 2  | .007            |
| Pair 4 | Control - Almhigh  | 24.26982           | 1.40000        | .80829          | 20.79203                                  | 27.74761  | 30.026   | 2  | .001            |
| Pair 5 | Control - pH4.56   | 12.54062           | .50000         | .28868          | 11.29855                                  | 13.78269  | 43.442   | 2  | .001            |
| Pair 6 | Control - pH3.60   | 8.79123            | 1.30000        | .75056          | 5.56185                                   | 12.02061  | 11.713   | 2  | .007            |
| Pair 7 | Al13high - pH4.56  | 5.61228            | .50002         | .28868          | 4.37017                                   | 6.85438   | 19.441   | 2  | .003            |
| Pair 8 | Almhigh - pH3.60   | -15.47859          | .10003         | .05775          | -15.72708                                 | -15.23010 | -268.017 | 2  | .000            |

3d:

|        |                    | Paired Differences |                |                 |                                           |           | t       | df | Sig. (2-tailed) |
|--------|--------------------|--------------------|----------------|-----------------|-------------------------------------------|-----------|---------|----|-----------------|
|        |                    | Mean               | Std. Deviation | Std. Error Mean | 95% Confidence Interval of the Difference |           |         |    |                 |
|        |                    |                    |                |                 | Lower                                     | Upper     |         |    |                 |
| Pair 1 | Control - Al13low  | 1.82000            | 3.00000        | 1.73205         | -5.63241                                  | 9.27241   | 1.051   | 2  | .404            |
| Pair 2 | Control - Almlow   | .38000             | 2.00000        | 1.15470         | -4.58828                                  | 5.34828   | .329    | 2  | .773            |
| Pair 3 | Control - Al13high | -6.66837           | 2.90000        | 1.67432         | -13.87238                                 | .53563    | -3.983  | 2  | .058            |
| Pair 4 | Control - Almhigh  | 16.89159           | 2.80000        | 1.61658         | 9.93600                                   | 23.84718  | 10.449  | 2  | .009            |
| Pair 5 | Control - pH4.56   | -.41147            | 2.00000        | 1.15470         | -5.37975                                  | 4.55681   | -.356   | 2  | .756            |
| Pair 6 | Control - pH3.60   | -4.16086           | 1.50000        | .86603          | -7.88707                                  | -.43465   | -4.805  | 2  | .041            |
| Pair 7 | Al13high - pH4.56  | 6.25690            | .90002         | .51962          | 4.02114                                   | 8.49267   | 12.041  | 2  | .007            |
| Pair 8 | Almhigh - pH3.60   | -21.05245          | 1.30001        | .75056          | -24.28185                                 | -17.82305 | -28.049 | 2  | .001            |

7d:

|        |                    | Paired Differences |                |                 |                                           |           | t         | df | Sig. (2-tailed) |
|--------|--------------------|--------------------|----------------|-----------------|-------------------------------------------|-----------|-----------|----|-----------------|
|        |                    | Mean               | Std. Deviation | Std. Error Mean | 95% Confidence Interval of the Difference |           |           |    |                 |
|        |                    |                    |                |                 | Lower                                     | Upper     |           |    |                 |
| Pair 1 | Control - Al13low  | 4.93000            | .50000         | .28868          | 3.68793                                   | 6.17207   | 17.078    | 2  | .003            |
| Pair 2 | Control - Almlow   | 4.93000            | 1.00000        | .57735          | 2.44586                                   | 7.41414   | 8.539     | 2  | .013            |
| Pair 3 | Control - Al13high | 12.64146           | 1.10000        | .63509          | 9.90890                                   | 15.37402  | 19.905    | 2  | .003            |
| Pair 4 | Control - Almhigh  | 20.82180           | 1.10138        | .63588          | 18.08583                                  | 23.55777  | 32.745    | 2  | .001            |
| Pair 5 | Control - pH4.56   | 4.10006            | .00010         | .00006          | 4.09981                                   | 4.10030   | 72353.941 | 2  | .000            |
| Pair 6 | Control - pH3.60   | 4.22951            | .10000         | .05774          | 3.98109                                   | 4.47793   | 73.255    | 2  | .000            |
| Pair 7 | Al13high - pH4.56  | -8.54140           | 1.10000        | .63509          | -11.27396                                 | -5.80884  | -13.449   | 2  | .005            |
| Pair 8 | Almhigh - pH3.60   | -16.59229          | 1.20130        | .69357          | -19.57649                                 | -13.60809 | -23.923   | 2  | .002            |

10d:

**Paired Samples Test**

|        |                    | Paired Differences |                |                 |                                           |           | t       | df | Sig. (2-tailed) |
|--------|--------------------|--------------------|----------------|-----------------|-------------------------------------------|-----------|---------|----|-----------------|
|        |                    | Mean               | Std. Deviation | Std. Error Mean | 95% Confidence Interval of the Difference |           |         |    |                 |
|        |                    |                    |                |                 | Lower                                     | Upper     |         |    |                 |
| Pair 1 | Control - Al13low  | 4.52333            | 2.56580        | 1.48137         | -1.85047                                  | 10.89714  | 3.053   | 2  | .093            |
| Pair 2 | Control - Alm1ow   | 5.89333            | 3.05505        | 1.76383         | -1.69583                                  | 13.48250  | 3.341   | 2  | .079            |
| Pair 3 | Control - Al13high | 9.31307            | 2.08154        | 1.20178         | 4.14224                                   | 14.48389  | 7.749   | 2  | .016            |
| Pair 4 | Control - Almhigh  | 25.63375           | 3.25179        | 1.87742         | 17.55584                                  | 33.71165  | 13.654  | 2  | .005            |
| Pair 5 | Control - pH4.56   | 4.26339            | 1.60731        | .92798          | .27061                                    | 8.25617   | 4.594   | 2  | .044            |
| Pair 6 | Control - pH3.60   | 4.39284            | 1.60697        | .92778          | .40091                                    | 8.38478   | 4.735   | 2  | .042            |
| Pair 7 | Al13high - pH4.56  | -5.04968           | .50000         | .28868          | -6.29175                                  | -3.80761  | -17.493 | 2  | .003            |
| Pair 8 | Almhigh - pH3.60   | -21.24090          | 1.70000        | .98150          | -25.46394                                 | -17.01787 | -21.641 | 2  | .002            |
